# Supplementary material for: Exome sequencing and disease-network analysis of a single family implicate a mutation in KIF1A in hereditary spastic paraparesis
Source: HighWire-hosted journal article supplement (doi:10.1101/gr.117143.110), 2011-04-12
Supplement: Erlich_GENOME_2010_117143_supp_table_1-3.pdf [file Erlich_GENOME_2010_117143_supp_table_1-3.pdf]

**Supplementary Table 1:**

| Gene name       | OMIM   | Phenotype                                  |
|-----------------|--------|--------------------------------------------|
| <i>ATL1</i>     | 606439 | SPG3A                                      |
| <i>BSCL2</i>    | 606158 | Silver syndrome, Neuropathy, Lipodystrophy |
| <i>CYP7B1</i>   | 603711 | SPG5, Bile acid synthesis defect           |
| <i>GJC2</i>     | 608803 | SPG44, Hypomyelinating                     |
| <i>HSPD1</i>    | 118190 | SPG13, hypomelinating leukodystrophy       |
| <i>KIAA0196</i> | 610657 | SPG8                                       |
| <i>KIAA1840</i> | 610844 | SPG11                                      |
| <i>KIF5A</i>    | 602821 | SPG10                                      |
| <i>L1CAM</i>    | 308840 | MASA syndrome                              |
| <i>NIPA1</i>    | 608145 | SPG6                                       |
| <i>SPG7</i>     | 602783 | SPG7                                       |
| <i>PLP1</i>     | 300401 | SPG2, Pelizaeus-Merzbacher disease         |
| <i>PNPLA6</i>   | 603197 | SPG39                                      |
| <i>REEP1</i>    | 609139 | SPG31                                      |
| <i>SLC16A2</i>  | 300095 | Allan-Herndon-Dudley syndrome              |
| <i>SLC33A1</i>  | 603690 | SPG42                                      |
| <i>SPAST</i>    | 604277 | SPG4                                       |
| <i>SPG20</i>    | 607111 | Troyer syndrome                            |
| <i>SPG21</i>    | 608181 | Mast syndrome                              |
| <i>ZFYVE26</i>  | 610243 | SPG33                                      |

**Supp. Table 1: List of genes that are associated with Hereditary Spastic Paraparesis.**

**Supp Table 2:**

|                              | Exclusion Method                                                                                          | Genes         | Positions     |
|------------------------------|-----------------------------------------------------------------------------------------------------------|---------------|---------------|
|                              | Known HSP genes in shared autosomal regions                                                               | 4             | 6981          |
| <b>Homo.</b>                 | ... AND homozygous variations that are not homozygous in the parents<br>... AND not in dbSNP/1000 Genomes | 1<br><b>0</b> | 1<br><b>0</b> |
| <b>Compound Heterozygous</b> | ... AND heterozygous variations                                                                           | 4             | 23            |
|                              | ... AND not in dbSNP/1000 Genomes                                                                         | 4             | 20            |
|                              | ... AND not synonymous changes                                                                            | 4             | 14            |
|                              | ... AND at least one parent is heterozygous                                                               | 2             | 2             |
|                              | ... AND two heterozygous hits in the same gene                                                            | <b>0</b>      | <b>0</b>      |

**Supp. Table 2: Rejection of variations in known HSP genes.** The top part of the table describes a rejection process assuming a homozygous variation. The bottom part describes a rejection process assuming a compound heterozygous. The exclusion process gave an empty set for both assumptions.

**Supp Table 3:**

| Exclusion Method                                                           | Genes    | Positions |
|----------------------------------------------------------------------------|----------|-----------|
| Variations that are present in the patient and not reference in the mother | 38       | 58        |
| ... AND not in dbSNP/1000 Genomes                                          | 7        | 10        |
| ... AND not synonymous changes                                             | 4        | 5         |
| ... AND father has the same variation                                      | 3        | 4         |
| ... <b>AND are supported by more than one read</b>                         | <b>0</b> | <b>0</b>  |
| ... OR conserved (GERP score>2)                                            | 1        | 1         |
| ... <b>AND predicted to be damaging by MutationTaster</b>                  | <b>0</b> | <b>0</b>  |

**Supp. Table 3: Rejection of variations in the shared region of chromosome X.**
